# Supplementary material
Source: publisher site journal article supplement (https://www.dovepress.com/get_supplementary_file.php?f=398552.docx)
Supplement: Supplementary file 1 [file get_supplementary_file.php]

Details of reviewed studies

| Ref No  Author(s)  Year | Topic/study question and study type | Sample size | Intervention/methods | Instruments/measures | Main findings | QA  (MERSQI) |
| --- | --- | --- | --- | --- | --- | --- |
| 22  Kemper (2017) | -changes in mindfulness after completing online mindfulness training  -PROSPECTIVE NON-RANDOMIZED PRE-POST INTERVENTION STUDY | N=178  -different professional groups; trainees and practicing professionals  (34% nurses, 24% physicians, 10% social workers and psychologists, 8% dietitians, 25%othr)  -United States of America | -three 1h mindfulness modules (Introduction to mindfulness, Mindfulness in daily life, Mindful breathing and walking) | -10-item Cognitive and Affective Mindfulness Scale-Revised (CAMS-R)  -15-item Mindful Attention Awareness Scale (MAAS)  -Baer's 39-item Five Facet Mindfulness Questionnaire (FFMQ) | -small but significant increase in mindfulness scores | 11 |
| 23  Dobkin et al (2016) | - enhancing clinician's wellbeing by MBSR and determining whether this impacted their subsequent medical encounters  -PROSPECTIVE NON-RANDOMIZED PRE-POST INTERVENTION STUDY | N=27  -clinicians (various professionals, 12 physicians)  -France | -8-week MBSR  -medical visits audiotaped and rated by patients  -measures pre/post | -Perceived Stress Scale (PSS)  -Beck Depression Inventory II (BDI)  -Sense of Coherence  -Maslach Burnout Inventory (MBI)  -Five Facet Mindfulness Questionnaire (FFMQ)  -Rochester Communication Rating Scale (RCRS)  -Roter Interaction Analysis System (RIAS)-coding system for assessing patient and clinician communication | -significant reductions in stress and burnout  -increase of mindfulness and meaningfulness  -improved patient-centered care (¾ subscales of Rochester Communication Rating Scale improved after intervention)  -MBI pre/post: E 23.7/21, D 6/4, PA 37.9/40.2 | 11 |
| 24  Kemper et al (2015) | -evaluating the effects of 1h online elective mind-body skills training for health professionals on mindfulness, resilience, and empathy  -PROSPECTIVE NON-RANDOMIZED PRE-POST INTERVENTION STUDY | N=513  -dietitians, nurses, physicians, social workers, clinical trainees, and health researchers  -United States of America | -1h modules (12) in a new online mind-body skills training program | -Maslach Burnout Inventory  -10-item Perceived Stress Scale  -10-item Cognitive and Affective Mindfulness Scale-Revised  -Mindful Attention Awareness Scale  -Smith's 6-item Brief Resilience Scale  -Interpersonal Reactivity Index – subscales of empatic concern and perspective taking | -acute improvements in stress, mindfulness, empathy, and resilience  -online MBS training reaches diverse health professionals  -MBI was not repeated post intervention | 11 |

| 25  Goodman et al (2012) | -effect of MBSR on burnout and mental well-being among  healthcare providers  -PROSPECTIVE NON-RANDOMIZED PRE-POST INTERVENTION STUDY | | N=93  -heathcare providers (51 physicians)  -United States of America | -MBSR (2.5 hours a week for 8 weeks plus a 7-hour retreat) | | -Maslach Burnout Inventory  -SF-12v2 | -significant reduction in burnout scores and mental well-being  -MBI for PHYSICIANS pre/post mean (SD): EE 28.1(9.8)/21.3(8.8), D 9.2(6.0)/6.7(5.3), PA 37.7(5.8)/41.0(5.1)  -MBI for OTHER HEALTHCARE PROVIDERS: EE 21.7(10.2)/18.8(9.4), D 5.0(3.8)/4.0(3.6), PA 38.4(6.1)/41.0(5.7) | | 10 | | |
| --- | --- | --- | --- | --- | --- | --- | --- | --- | --- | --- | --- |
| 26  Asuero et al (2014) | -effectiveness of a training program designed to reduce burnout and mood disturbance, increase empathy, and develop mindfulness  -RANDOMIZED CONTROLLED TRIAL | | N=68  -primary health care professionals  -Spain | -presentations of clinically relevant topics, mindfulness-based coping strategies, mindfulness practice, yoga, and group discussions (8 sessions of 2.5 hours per week plus a 1-day session of 8 hours)  -measures pre/post | | -Maslach Burnout Inventory  -Profile of Mood States  -Jefferson Scale of Physician Empathy  -Baer's Five Facets Mindfulness Questionnaire  -questionnaire on changes in personal habits and mindfulness practice | -improvement in the 4 measured scales  -large magnitude of change in total mood disturbance and mindfulness, moderate in burnout and empathy scales  -MBI INTERVENTION GROUP (post-pre difference) total -6.0, EE -5.5, D -2.5, PA 2.1  -MBI CONTROL GROUP: total 1.0, EE 0.7, D 0.0, PA 0.3 | | 12.5 | | |
| 27  Sallon et al (2015) | -evaluating the effects of a stress-reduction intervention  -PROSPECTIVE NON-RANDOMIZED PRE-POST CONTROLLED INTERVENTION STUDY | | N=215 (118 participants, 97 controls)  -hospital staff  -Israel | -CCG (Caring for the caregivers) 8 months workshops (5 components: cognitive-mindfulness, somatic-body awareness, dynamic, emotive, hands-on)  -measures pre/post | | -Maslach Burnout Inventory (MBI)  -Perceived Stress Scale (PSS)  -General Health Questionnaire (GHQ)  -Job Related Tension Index (JRTI)  -Productivity Scale (PS)  -Positive and Negative Affect Schedule (PANAS)  -Visual Analogue Scales (VAS) | -very significant improvements in quality of work (decrease in job related tension, increased work productivity), decrease in symptoms of percieved stress and emotional exhaustion associated with burnout, and improvements in mood and somatic and mental health symptoms  -MBI pre/post mean (SD) for intervention group: EE 20.0(11.62)/15.47(9.08), D 3.62(4.62)/3.51(4.05), PA 38.08(8.0)/38.80(8.30); control group: EE 17.21(10.36)/18.35(10.86), D 2.49(3.36)/3.95(6.02), PA 36.43(7.73)/35.14(8.51) | | 10.5 | | |
| 28  Moody et al (2013) | -effect of MBC (mindfulness-based course) on burnout  -RANDOMIZED CONTROLLED PILOT STUDY | | N=48  -a multidisciplinary group of pediatric oncology staff members, mostly nurses  -United States of America and Israel | -MBC intervention (8 weekly sessions of mindfulness education; 15h in total) | | -Maslach Burnout Inventory (MBI)  -Perceived Stress Scale -14 (PSS)  -Beck Depression Inventory (BDI) | -no significant improvement in scores burnout, perceived stress or depression scales  -qualitative analysis revealed reduced stress, improved inner peace, compassion and joy, better focus and self-awareness and less somatic symptoms  -MBI pre/post: EE 27.2/26.9, D 19.6/19.3, PA 16.0/15.0 (t Test-non significant change in all three subscales) | | | 12.5 | |
| 29  Abeni et al (2014) | -evaluating the effect of a new approach in promoting more functional ways to face stressful situations for caregivers, physicians and nurses  -PROSPECTIVE NON-RANDOMIZED PRE-POST INTERVENTION STUDY | | N=34  -10 caregivers, 11 physicians/hematologists, 13 nurses  -Italy | -"Balint Group" method modified according to a mindfulness technique  -measures taken pre/mid/post | | -Response Evaluation Measure (REM-71)  -Satisfaction Profile (SAT-P)  -Group Climate Questionnaire (GCQ) | -development of more adaptive ways of using defense mechanisms and the effectiveness of the intervention observed | | | 10 | |
| 30  Lamothe et al (2018) | -assessing the feasibility and acceptability of a MBSR and its effect on empathy and emotional competencies  -PROSPECTIVE NON-RANDOMIZED PRE-POST INTERVENTION STUDY | | N=37  -study 1: 12 psychology students  -study 2: 25 professional caregivers at Department of Hematology/Oncology (8% physicians)  -Canada | -8-week MBSR  -measures pre/post | | -Mindful Attention Awareness Scale  -Interpersonal Reactivity Index (IRI)  -Profile of Emotional Competence (PEC)  -Acceptance and Action Questionnaire-II (AAQ-II)  -Geneva Emotion Recognition Test (GERT) | -program was feasible and acceptable  -significant improvements on: perspective taking, identification of one's own emotions and emotional acceptance | | | 11.5 | |
| 31  Gracia Gozalo et al (2019) | -to evaluate the effect of a mindfulness training program on the levels of burnout, mindfulness, empathy and self-compassion  -PROSPECTIVE NON-RANDOMIZED PRE-POST INTERVENTION STUDY | N=32  -physicians, nurses, nursing assistants  -Intensive Care Unit  -Spain | | | -8-week mindfulness training  -measures pre/post | -Maslach Burnout Inventory – Human Service Survey (MBI-HS)  -Five Facets of Mindfulness Questionnaire (FFMQ)  -Jefferson Empathy Scale  -Self-Compassion Scale (SCC) | | -a decrease in emotional exhaustion and an increase in self-compassion  -MBI pre/post is reported graphically therefore exact numerical vavues cannot be outlined | | | 11 |
| 32  Suyi et al (2017) | -examining the effectiveness of a mindfulness program in increasing mindfulness and compassion, and reducing stress and burnout  -PROSPECTIVE NON-RANDOMIZED PRE-POST INTERVENTION STUDY | N=37  -mental health professionals  -Singapore | | | -modified MBSR  -measures pre/post/after 3 months | -Five Facets Mindfulness Questionnaire  -Self-Compassion Scale-SF  -Compassion Scale  -Perceived Stress Scale-10  -Oldenburg Burnout Inventory | | -significant improvement in four of the five mindfulness facets and compassion levels; gains maintained at 3 months follow-up  -significant reduction in stress  -no change for burnout variables | | | 11 |
| 33  Steinberg et al (2017) | -evaluating the feasibility of a workplace intervention for increasing resilience to stress  -RANDOMIZED CONTROLLED PILOT STUDY | N=32  -surgical intensive care unit personnel  -United States of America | | | -8-week mindfulness-based intervention (meditation, mild yoga movement, music)  -measures pre/post | -Maslach Burnout Inventory  -Professional Quality of Life (ProQOL)  -9-item Utrecht Work Engagement Scale (UWES) | | -intervention was well received  -work satisfaction increased significantly and negatively correlated with burnout  -participants rated recognizing their stress response as a main benefit  -MBI results not reported | | | 12.5 |
| 34  Kemper et al (2015) | -the impact of online MBS training on stress, mindfulness, and confidence in providing calm, compassionate care  -PROSPECTIVE NON-RANDOMIZED PRE-POST INTERVENTION STUDY | N=103  -clinicians and trainees  -United States of America | | | -MBS training (12 1h modules) – median engagement with 3 | -10-item Cognitive and Affective Mindfulness Scale-Revised (CAMS-R)  -12-item Neff's self-compassion scale  -10-item Calm Compassionate Care Scale  -Smith's 6-item Brief Resilience Scale  -7-item Empathic Concern Scale (ECS)  -7-item Perspective Taking (PT) | | -significant improvements in measures of stress, mindfulness, and confidence in providing calm, compassionate care  -no change in empathy | | | 11.5 |
| 35  Barattucci et al (2019) | -to analyze the efficacy of the mindfulness-based IARA model in order to ameliorate perceived stress, anxiety and enhance emotional regulation among healthcare professionals  -PROSPECTIVE RANDOMIZED PRE-POST INTERVENTION STUDY | N=602  -healthcare professionals from different public hospitals (doctors, nurses, healthcare assistants)  -Italy | | | -IARA training program (n=301) and control group (n=301)  -measures taken pre/post 6 months | -Zung Self-Rating Anxiety Scale (SAS)  -Difficulties in Emotion Regulation Scale (DERS-36)  -Perceived Stress Scale (PSS) | | -experimental group had better emotional regulation, anxiety and stress indices after 6 months from the end of the intervention  -results confirmed the positive relationship between emotional regulation, perceived stress and anxiety | | | 11.5 |
| 36  Janssen et al  (2020) | -to evaluate the feasibility and acceptability of a MBSR training and to examine positive and negative symptom-focused mental health variables  -PROSPECTIVE NON-RANDOMIZED PRE-POST INTERVENTION STUDY | N=30  -healthcare professionals at a hospital specialized in musculoskeletal problems  -Netherlands | | | -MBSR  -measures pre/post intervention | -Dutch version of the FFMQ (FFMQ-NL)  -Dutch version of the MBI-GS: the Utrecht Burnout Scale-General (UBOS-A)  -the stress scale of the Dutch Depression, Anxiety and Stress Scale (DASS)  -the Dutch sleep quality subscale of the VBBA  -the Dutch version of the Job-related Affective Well-Being Scale (JAWS)  -the Dutch General Self-Efficacy Scale  The Dutch version of the shortened Utrecht Work Engagement Scale (UWES), the UBES-9  -the Dutch VBBA worrying subscale | | -significant improvements in general mindfulness, the burnout dimension PA, quality of sleep, positive emotions, and self-efficacy  -significant decrease in EE, stress level, negative emotions at work, and worrying  -no significant changes found for the burnout dimension mental distance, and work engagement | | | 10.5 |
